# Supplementary material for: Syphilis at the Crossroad of Phylogenetics and Paleopathology
Source: PLoS Negl Trop Dis. 2010 Jan 5;4(1):e575. doi: 10.1371/journal.pntd.0000575 (PMC2793018; doi:10.1371/journal.pntd.0000575)
Supplement: Table S1 — Referenced list of archaeological sites containing pre-Columbian evidences of treponematosis, yaws, bejel and venereal and congenital syphilis used to construct Figure 3. (0.17 MB XLS) [file pntd.0000575.s001.xls]

## Sheet: loc
Location	Period	Interval	Reported Pathology	Pathology on the Map	References
Andean (Peru & Chile)	More than 8000 years	6000 - 1000 BC	treponematosis	treponematosis	Gerszten et al., 1998; Neurosurgery 42: 1145-1151
Brazil, São Paulo	5895-4511 ybp	6000 - 1000 BC	treponematosis	treponematosis	Eggers et al, 2008; Homo. 59(6):405-27
Canada, Crescent Beach (British Columbia)	4000-3000 ybp	6000 - 1000 BC	endemic	bejel	Molto et al., 2000; Chungará (Arica) v.32 n.2
Colombia, Aguazuque	5000 ybp	6000 - 1000 BC	treponematosis/syphilis?	probable venereal syphilis	Burgos et al., 1994; RACCEFyN 19 (73): 237-241.
Egypt	Old Kingdom 2686-2134 BC	6000 - 1000 BC	probable yaws	probable yaws	apud Meyer et al, 2002; Homo 53: 39-58.
India, Bhimbetka, Madhya Pradesh,	iron age, megalithic	6000 - 1000 BC	yaws	yaws	Kennedy, 1990; Proc. Int. Conf. Assoc. South Asian Archeol. 9:61-77
Iraq	4000 ybp	6000 - 1000 BC	bejel	bejel	Rothschild & Rothschild, 1996; Human Evolution 11 (1): 11-15.
Mexico, Tlatilco IV	3100 ybp	6000 - 1000 BC	endemic	bejel	Mansilla et al., 2000; Chungará (Arica) 32 no.2: 167-174.
Russia, Siberia	3000-2000 BC	6000 - 1000 BC	syphilis	venereal syphilis	Baker et al., 1988; Curr Anthropol 29: 703-738.
United Arab Emirates, Tell Abraq	4500-2400 ybp	6000 - 1000 BC	bejel	bejel	Rothschild et al., 2006; Acta Trop 99: 160-164.
USA, Carrier Mills (Illinois)	6300 ypb	6000 - 1000 BC	yaws	yaws	Rothschild in Greenblatt & Spigelman, 2003, Oxford Univ. Press
USA, Humboldt Sink & Carson Sink (Nevada)	9000-1000 ybp	6000 - 1000 BC?	endemic	bejel	Rothschild in Greenblatt & Spigelman, 2003, Oxford Univ. Press
USA, Indian Knoll site (Kentucky)	3300 BC	6000 - 1000 BC	syphilis	venereal syphilis	apud El-Najjar, 1979; . Am. J Phys. Anthrop. ,55: 599-618.
USA, Jersey County (Illinois)	1000-6000 ybp	6000 - 1000 BC?	yaws	yaws	Rothschild & Rothschild, 1996; Curr Antrhopol 37 (3): 555-561.
USA, Lu - 25 (Alabama)	4300 ypb	6000 - 1000 BC	yaws	yaws	Rothschild in Greenblatt & Spigelman, 2003, Oxford Univ. Press
USA, Oconto County (Wisconsin)	3250 ypb	6000 - 1000 BC	yaws	yaws	Rothschild in Greenblatt & Spigelman, 2003, Oxford Univ. Press
USA, Windover (Florida)	7900 ypb	6000 - 1000 BC	yaws	yaws	Rothschild in Greenblatt & Spigelman, 2003, Oxford Univ. Press
USA, Ward (Kentucky)	4300 ybp	6000 - 1000 BC	yaws	yaws	Rothschild in Greenblatt & Spigelman, 2003, Oxford Univ. Press
Sudan, Africa	15000ybp	6000 - 1000 BC	bejel	bejel	Rothschild & Rothschild, 1996; Human Evolution 11 (1): 11-15.
Bolivia, Lomo Salvatierra	7-12th century	1000 BC - 1000 AD	possible yaws	probable yaws	Obertová et al., 2008; 17th PPA Meeting
Brazil, Jaboticabeira II (Santa Catarina)	2890-2186 ybp	1000 BC - AD 1000	treponematosis	treponematosis	Okumura & Eggers, 2005; Homo 55:263-381.
Canada, Prince Rupert Harbor (British Columbia)	3200 ypb	1000 BC - AD 1000	endemic	bejel	Molto et al., 2000; Chungará (Arica) v.32 n.2
China, northeastern Qinghai	3000-1500 BP	1000 BC - AD 1000	endemic syphilis	bejel	Suzuki et al, 2005; Anthropol Sci 113: 253–258,
France, Costebelle	3rd - 4th century AD	1000 BC - AD 1000	congenital syphillis	venereal syphilis	Berato et al, 1994 in Dutour et al, 1994, Edition Errance.
France, Normandie	Late Roman Empire	1000 BC - AD 1000	veneral syphilis?	probable venereal syphilis	apud Trembly, 1996; Int. J. Osteoarchaeol, 6: 397-402
Guam	854 (+/- 145) AD	1000 BC - AD 1000	treponematosis	treponematosis	apud Trembly, 1996; Int. J. Osteoarchaeol, 6: 397-402
Guatemala, Zaculeu	900-1000 AD	1000 BC - AD 1000	venereal syphilis	venereal syphilis	apud El-Najjar, 1979; . Am. J Phys. Anthrop. ,55: 599-618.
India, Agripalle, Andhra Pradesh	iron age, megalithic	1000 BC - AD 1000	treponematosis	treponematosis	Rao, Vasulu and Babu, 1996; Am Jour Phys Anthropol 100:49-55.
India, Inamgaon	1000-700 BC	1000 BC - AD 1000	treponematosis/yaws?	probable yaws	Lukacs et al., 1986; Proc. Amer. Philos. Soc1. 30(3):289-311.
Iraq	<500 AD	1000 BC - AD 1000	treponematosis	treponematosis	apud Baker et al., 1988; Curr Anthropol 29: 703-738.
Italy, Greek colony of Metaponto	580 - 250 BC	1000 BC - AD 1000	syphilis/congenital syphilis	venereal syphilis	Henneberg & Henneberg, 1993; Am J Phys Anthrop Suppl. 16: 107–108.
Israel, Negev	2000 ybp	1000 BC - AD 1000	bejel	bejel	Rothschild & Rothschild, 1996; Human Evolution 11 (1): 11-15.
Mexico, Candellaria Mountains	500 AD	1000 BC - AD 1000	venereal syphilis	venereal syphilis	apud El-Najjar, 1979; . Am. J Phys. Anthrop. ,55: 599-618.
Mexico, Tehuacan	300 BC	1000 BC - AD 1000	probably syphilis	probable venereal syphilis	apud El-Najjar, 1979; . Am. J Phys. Anthrop. ,55: 599-618.
Peru, Huacho	prehistoric	1000 BC - AD 1000	treponematosis	treponematosis	Brothwell in Powell & Cook, 2005, University Press of Florida
Peru, Paracas	pre-Inca (before 1200)	1000 BC - AD 1000	treponematosis	treponematosis	Brothwell in Powell & Cook, 2005, University Press of Florida
Peru's central coast	prehistoric	1000 BC - AD 1000	treponematosis	treponematosis	Brothwell in Powell & Cook, 2005, University Press of Florida
Russia, Siberia	1000 BC	1000 BC - AD 1000	treponematosis	treponematosis	apud Trembly, 1996; Int. J. Osteoarchaeol, 6: 397-402
Sudan, Africa	200 BCE-200 AD	1000 BC - AD 1000	Bejel	bejel	Rothschild & Rothschild, 1996; Human Evolution 11 (1): 11-15.
Sudan, Africa	200 - 550 AD	1000 BC - AD 1000	Bejel	bejel	Rothschild & Rothschild, 1996; Human Evolution 11 (1): 11-15.
Tinian Island	854 (+/ - 145) AD	1000 BC - AD 1000	yaws	yaws	apud Trembly, 1996; Int. J. Osteoarchaeol, 6: 397-402
USA, Amaknak Island (Acutians/Aleutians?)	2000 ybp	1000 BC - AD 1000	yaws	yaws	Molto et al., 2000; Chungará (Arica) v.32 n.2
USA, Anasazi (Colorado Plateau)	1300-1100 ybp	1000 BC - AD 1000	syphilis	venereal syphilis	Rothschild in Greenblatt & Spigelman, 2003, Oxford Univ. Press
USA, Basketmaker II (Colorado Plateau)	2000 ybp	1000 BC - AD 1000	yaws	yaws	Rothschild in Greenblatt & Spigelman, 2003, Oxford Univ. Press
USA,Basketmaker III (Colorado Plateau)	1500-1800 ybp	1000 BC - AD 1000	syphilis	venereal syphilis	Rothschild in Greenblatt & Spigelman, 2003, Oxford Univ. Press
USA, Chinchera (New Mexico)	1300 ybp	1000 BC - AD 1000	yaws	yaws	Molto et al., 2000; Chungará (Arica) v.32 n.2
USA, Clarkdale (Arizona)	1000-1350 AD	1000 BC - AD 1000	venereal syphilis?	probable venereal syphilis	apud El-Najjar, 1979; . Am. J Phys. Anthrop. ,55: 599-618.
USA, Coastal North Carolina	0-1500 AD	1000 BC - AD 1000?	treponematosis	treponematosis	Hutchinson & Richman, 2006; Am. Jour. Phys. Anthrop., 129: 544-558.
USA, Frontenac Island (New York State)	2000 ybp	1000 BC - AD 1000	treponematosis/yaws?	probable yaws	Rothschild in Greenblatt & Spigelman, 2003, Oxford Univ. Press
USA, Grasshopper (Arizona)	1250-1450 ybp	1000 BC - AD 1000	yaws	yaws	Rothschild in Greenblatt & Spigelman, 2003, Oxford Univ. Press
USA, Libben (Ohio)	1200-850 ybp	1000 BC - AD 1000?	yaws	yaws	Rothschild & Rothschild, 1996; Curr Antrhopol 37 (3): 555-561.
USA, Mattock (New Mexico)	1650-850 ybp	1000 BC - AD 1000?	yaws (oldest), venereal syphilis (youngest)	yaws and venereal syphilis	Rothschild & Rothschild, 1996; Curr Antrhopol 37 (3): 555-561.
USA, New York State	500 BC	1000 BC - AD 1000	probable treponematosis	probable treponematosis	Elting & Starna, 1984; Am. Jour. Phys. Antrhop., 65: 267-273.
USA, Palo Pardo (Arizona)	1250-1450 ybp	1000 BC - AD 1000	yaws	yaws	Rothschild in Greenblatt & Spigelman, 2003, Oxford Univ. Press
USA, San Antonio (Texas)	1100-1800 ybp	1000 BC - AD 1000	yaws	yaws	Molto et al., 2000; Chungará (Arica) v.32 n.2
USA, San Francisco Bay	2250 ybp	1000 BC - AD 1000	endemic	bejel	Molto et al., 2000; Chungará (Arica) v.32 n.2
USA, Sonoma County (California)	500 BC	1000 BC - AD 1000	syphilis?	probable venereal syphilis	apud El-Najjar, 1979; . Am. J Phys. Anthrop. ,55: 599-618.
USA, Tchefuncte (Louisiana)	500 BC-300 AD	1000 BC - AD 1000	bejel (endemic syphilis)	bejel	Lewis, 1994; Am J Phys Anthrop 93: 455–475.
USA, Turkey Creek (Arizona)	1200-1400 ybp	1000 BC - AD 1000	yaws	yaws	Rothschild in Greenblatt & Spigelman, 2003, Oxford Univ. Press
Mexico, Tecualilla & Chalpa Nay	1150-1300 AD (=CE)	AD 1000 - Contact	endemic	bejel	Mansilla et al., 2000; Chungará (Arica) 32 no.2: 167-174.
Australia	Pre-european population	AD 1000 - Contact	treponematosis	treponematosis	Brothwell in Powell & Cook, 2005, University Press of Florida
Borneo	Pre-european population	AD 1000 - Contact	treponematosis	treponematosis	Brothwell, 1976; Bulletin of the History of Medicine, 50:435-42.
Britain, (1) Ireland and (2) Gloucester	13th-15th centuries AD	AD 1000 - Contact	treponematosis	(2) treponematosis	Brothwell in Powell & Cook, 2005, University Press of Florida
Dominican Republic	800-1400 AD	AD 1000 - Contact?	venereal syphilis?	probable venereal syphilis	Rothschild et al., 2000; Clin Infect Dis 31: 936-941.
Ecuador	700 ybp	AD 1000 - Contact	syphilis	venereal syphilis	Rothschild in Greenblatt & Spigelman, 2003, Oxford Univ. Press
England, Kingston-upon Hull	1300-1450 AD	AD 1000 - Contact	venereal	venereal syphilis	von Hunnius et al, 2006; Am J Phys Anthropol 129: 559-566.
England, Ipswich Blackfriars	1445-1520 AD	AD 1000 - Contact	treponematosis	treponematosis	Mays, Crane-Kramer, Bayllis, 2003; Am J Phys Anthropol 120: 133-143.
England, Magdalen Street (Norwich)	1100-1468 AD	AD 1000 - Contact	treponemal	probable venereal syphilis	Stirland, 1991; Biometrika, 23: 191-248.
England, Norwich	terminus ante quem of 1468	AD 1000 - Contact	treponematosis	treponematosis	apud Trembly, 1996; Int. J. Osteoarchaeol, 6: 397-402
England, Rivenhall, Essex	1295-1445 AD	AD 1000 - Contact	treponematosis	treponematosis	Mays, Crane-Kramer, Bayllis, 2003; Am J Phys Anthropol 120: 133-143.
England, Spitalfields, London	pre-1530	AD 1000 - Contact	treponematosis	treponematosis	Brothwell in Powell & Cook, 2005, University Press of Florida
England, York	1197-1419 AD	AD 1000 - Contact	treponematosis	treponematosis	apud Mays et al., 2003; Am J Phys Anthropol 120: 133-143.
France, Abbey Ardenne, Caen	13th century	AD 1000 - Contact	treponematosis	treponematosis	Alduc Le-Bagousse et al., 2008; 17th PPA Meeting.
France, Church Thaon, Caen	14th century	AD 1000 - Contact	treponematosis	treponematosis	Alduc Le-Bagousse et al., 2008; 17th PPA Meeting.
Germany, Munsterland	1097-1127 AD	AD 1000 - Contact	treponarid	bejel	Kuhnen et al, 1999; Pathologe 20: 292-296.
Guam	1200-1500 AD	AD 1000 - Contact	yaws	yaws	Trembly, 1996; Int. J. Osteoarchaeol, 6: 397-402
Guam	1000-1521 AD	AD 1000 - Contact	yaws	yaws	Douglas et al, 1997; Am J Phys Anthropol 104: 291-313.
Guam	1000-1521 AD	AD 1000 - Contact	treponematosis/yaws?	probable yaws	Pietrusewsky et al., 1997; Am J Phys Anthropol 104: 315-342
Hawaii	Pre-european population	AD 1000 - Contact	treponematosis	treponematosis	Brothwell in Powell & Cook, 2005, University Press of Florida
Hungary, Castle of Szeged	Medieval	AD 1000 - Contact	veneral syphilis	treponematosis and venereal syphilis	Palfi et al., 2008, 17th PPA Meetin; Osz, 2006; A Biol Szegediensis 50(3-4):167
Israel, Safed	1290-1420 AD	AD 1000 - Contact	treponematosis	treponematosis	Mitchell, 2003; Am J Phys Anthropol 121: 117-124.
Italy, Roca Vecchia, Lecce	14th-16th centuries	AD 1000 - Contact	treponematosis/veneral syphilis?	probable venereal syphilis	apud Meyer et al, 2002; Homo 53: 39-58.
Japan	1512-1513 AD	AD 1000 - Contact	venereal syphilis	venereal syphilis	apud Trembly, 1996; Int. J. Osteoarchaeol, 6: 397-402
Mexico, Coahuila	1000-1600 AD	AD 1000 - Contact	venereal syphilis	venereal syphilis	Pineda et al., 1998; Am J Roentgenol 171: 321-324.
Mexico, Subway Tunnels in Mexico City	1300-1521 AD	AD 1000 - Contact	syphilis/yaws	venereal syphilis and yaws	Mansilla et al., 2000; Chungará (Arica) 32 no.2: 167-174.
Norway, Trondheim	16th century	AD 1000 - Contact	treponematosis/endemic syphillis?	probable bejel	apud Powell & Cook, 2005, University Press of Florida
Papua New Guinea	1000-1600 AD	AD 1000 - Contact	treponematosis	treponematosis	apud Trembly, 1996; Int. J. Osteoarchaeol, 6: 397-402
Papua New Guinea	1200-1700 AD	AD 1000 - Contact	treponematosis	treponematosis	apud Meyer et al, 2002; Homo 53: 39-58.
Peru, Machu Pichu	1100-1200 AD	AD 1000 - Contact	venereal syphillis	venereal syphillis	apud Erdal, 2006; Int J Osteoarchaeol 16: 16-33.
Peru, Tacna-Arica	900-1350 AD	AD 1000 - Contact?	syphilis?	probable venereal syphilis	apud El-Najjar, 1979; . Am. J Phys. Anthrop. ,55: 599-618.
Poland	11th-14th centuries AD	AD 1000 - Contact	probable treponematosis	probable treponematosis	apud Meyer et al, 2002; Homo 53: 39-58.
Rota	1000-1521 AD	AD 1000 - Contact	treponematosis/yaws?	probable yaws	Pietrusewsky et al, 1997; Am J Phys Anthropol 104: 315-342.
Russia, Krasnaya Zarya	11th-13th centuries	AD 1000 - Contact	treponematosis	treponematosis	apud Buzhilova, 1999; Int. J. Osteoarchaeol. 9: 271–276
Russia, Rostov Velikiy	middle of 16th century	AD 1000 - Contact?	treponematosis and veneral syphillis	treponematosis and venereal syphilis	Buzhilova, 1999; Int. J. Osteoarchaeol. 9: 271–276
Russia, Sarcel	10-12th centuries	AD 1000 - Contact	treponematosis	treponematosis	apud Buzhilova, 1999; Int. J. Osteoarchaeol. 9: 271–276
Saipan	pre-Spanish contact	AD 1000 - Contact	treponematosis/yaws?	probable yaws	apud Trembly, 1996; Int. J. Osteoarchaeol, 6: 397-402
Solomon Islands	1200-1400 AD	AD 1000 - Contact	yaws	yaws	Trembly, 1996; Int. J. Osteoarchaeol, 6: 397-402
South Africa	1000-1300 AD	AD 1000 - Contact	treponematosis	treponematosis	Steyn and Henneberg, 1995; Current Anthropol, 36 (5) 869-873.
Tinian	1000-1521 AD	AD 1000 - Contact	treponematosis/yaws?	probable yaws	Pietrusewsky et al, 1997; Am J Phys Anthropol 104: 315-342.
Tonga	ca 800-1700 AD	AD 1000 - Contact?	yaws	yaws	Buckley, 2000; Am J Phys Anthropol 113: 481-505.
Tonga	Pre-european population	AD 1000 - Contact	treponematosis	treponematosis	apud Powell & Cook, 2005, University Press of Florida
Turkey, in Western Anatolia	13th century AD	AD 1000 - Contact	congenital syphilis	venereal syphilis	Erdal, 2006; Int J Osteoarchaeol 16: 16-33.
USA, Kinishiba (Arizona)	1233-1306 AD	AD 1000 - Contact	syphilis	venereal syphilis	apud El-Najjar, 1979; . Am. J Phys. Anthrop. ,55: 599-618.
USA, Arizona	900-1100 AD	AD 1000 - Contact?	syphilis?	probable venereal syphilis	El-Najjar, 1979; . Am. J Phys. Anthrop. ,55: 599-618.
USA, Arkansas	pre-Columbian	AD 1000 - Contact?	venereal syphilis	venereal syphilis	El-Najjar, 1979; . Am. J Phys. Anthrop. ,55: 599-618.
USA, Cape Canaveral (Florida)	700 ybp	AD 1000 - Contact	venereal syphilis	venereal syphilis	Rothschild & Rothschild, 1996; Curr Antrhopol 37 (3): 555-561.
USA, Coastal Florida	500-1550 AD	AD 1000 - Contact?	treponematosis	treponematosis	Hutchinson & Richman, 2006; Am J Phys Anthropol 129: 544-558.
USA, Coastal North Carolina	350 AD-European pre-contact	AD 1000 - Contact?	treponematosis	treponematosis	apud Meyer et al, 2002; Homo 53: 39-58.
USA, Fisher Site (Virginia)	1000-1400 AD	AD 1000 - Contact	congenital syphilis	venereal syphilis	apud Meyer et al, 2002; Homo 53: 39-58.
USA, Grasshopper (Arizona)	750 ybp	AD 1000 - Contact	syphilis	venereal syphilis	Molto et al., 2000; Chungará (Arica) v.32 n.2
USA, Hardin site (North Carolina)	11th-15th centuries AD	AD 1000 - Contact	treponematosis?	probable treponematosis	Reichs, 1989; Am. Jour. Phys. Anthrop., 79: 289-303.
USA, Illinois	1000-1400 AD	AD 1000 - Contact	syphilis	venereal syphilis	apud El-Najjar, 1979; . Am. J Phys. Anthrop. ,55: 599-618.
USA, Kuaua Mound (New Mexico)	650-400 ybp	AD 1000 - Contact	venereal syphilis	venereal syphilis	Rothschild & Rothschild, 1996; Curr Antrhopol 37 (3): 555-561.
USA, Lewis Creek (Virginia)	700 ybp	AD 1000 - Contact	yaws	yaws	Rothschild & Rothschild, 1996; Curr Antrhopol 37 (3): 555-561.
USA, Los Palmos (California)	500-800 ybp	AD 1000 - Contact	endemic	bejel	Molto et al., 2000; Chungará (Arica) v.32 n.2
USA, New Mexico	1250-1350 AD	AD 1000 - Contact	syphilis?	probable venereal syphilis	El-Najjar, 1979 ;. Am. J Phys. Anthrop. ,55: 599-618.
USA, Piedmont (Alabama)	800-1500 AD	AD 1000 - Contact?	treponematosis	treponematosis	Hutchinson & Richman, 2006; Am J Phys Anthropol 129: 544-558.
USA, Point Hope (Alaska)	300-600 ybp	AD 1000 - Contact	syphilis	venereal syphilis	Molto et al., 2000; Chungará (Arica) v.32 n.2
USA, Pottery Mound (New Mexico)	700-500 ybp	AD 1000 - Contact	venereal syphilis	venereal syphilis	Molto et al., 2000; Chungará (Arica) v.32 n.2
USA, Tenessee	800-1500 AD	AD 1000 - Contact?	treponematosis	treponematosis	Hutchinson & Richman, 2006; Am J Phys Anthropol 129: 544-558.
USA, Tierra Verde & Aqui Esta (Florida)	1100-1500 AD	AD 1000 - Contact	non-venereal treponematosis	treponematosis	Hutchinson, 1993; Am J Phys Anthrop 92: 249–261
USA, Tierra Verde & Aqui Esta (Florida)	pre 1300 AD	AD 1000 - Contact?	syphilis	venereal syphilis	apud El-Najjar, 1979; . Am. J Phys. Anthrop. ,55: 599-618.
USA, Virginia	before 1400 AD	AD 1000 - Contact?	congenital syphilis	venereal syphilis	El-Najjar, 1979; . Am. J Phys. Anthrop. ,55: 599-618.
